# Supplementary material for: A Comparison of β-Carotene, Phytoene and Amino Acids Production in Dunaliella salina DF 15 (CCAP 19/41) and Dunaliella salina CCAP 19/30 Using Different Light Wavelengths
Source: MDPI journal article supplement (doi:10.3390/foods10112824), 2021-11-16
Supplement: s1 [file s1]

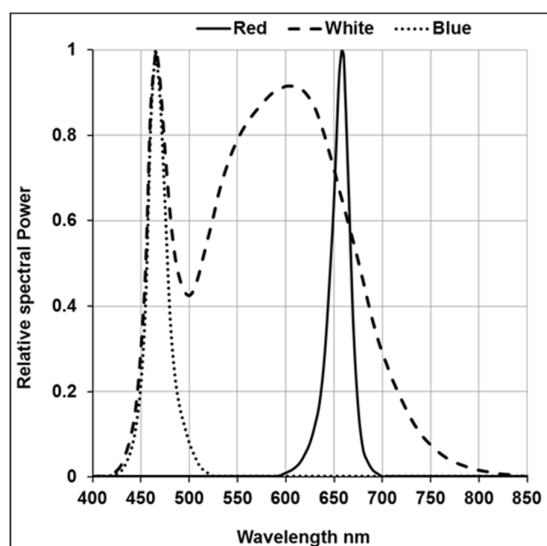

**Figure S1.** Typical relative spectral power distribution of white, blue and red LED lights in the Algem® bioreactor.

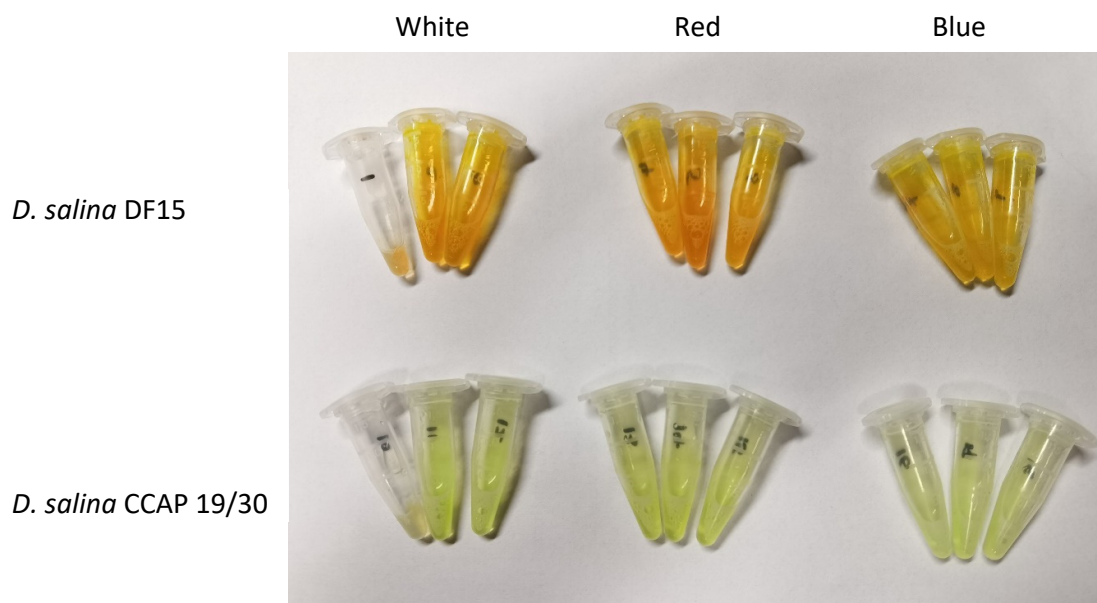

**Figure S2:** Appearance of *D. salina* cultures at the end of each treatment. Cultivation was conducted at 25°C, pH 7.5 and 100 rpm mixing using white, red and blue light at 200  $\mu\text{mol photons m}^{-2} \text{s}^{-1}$ .

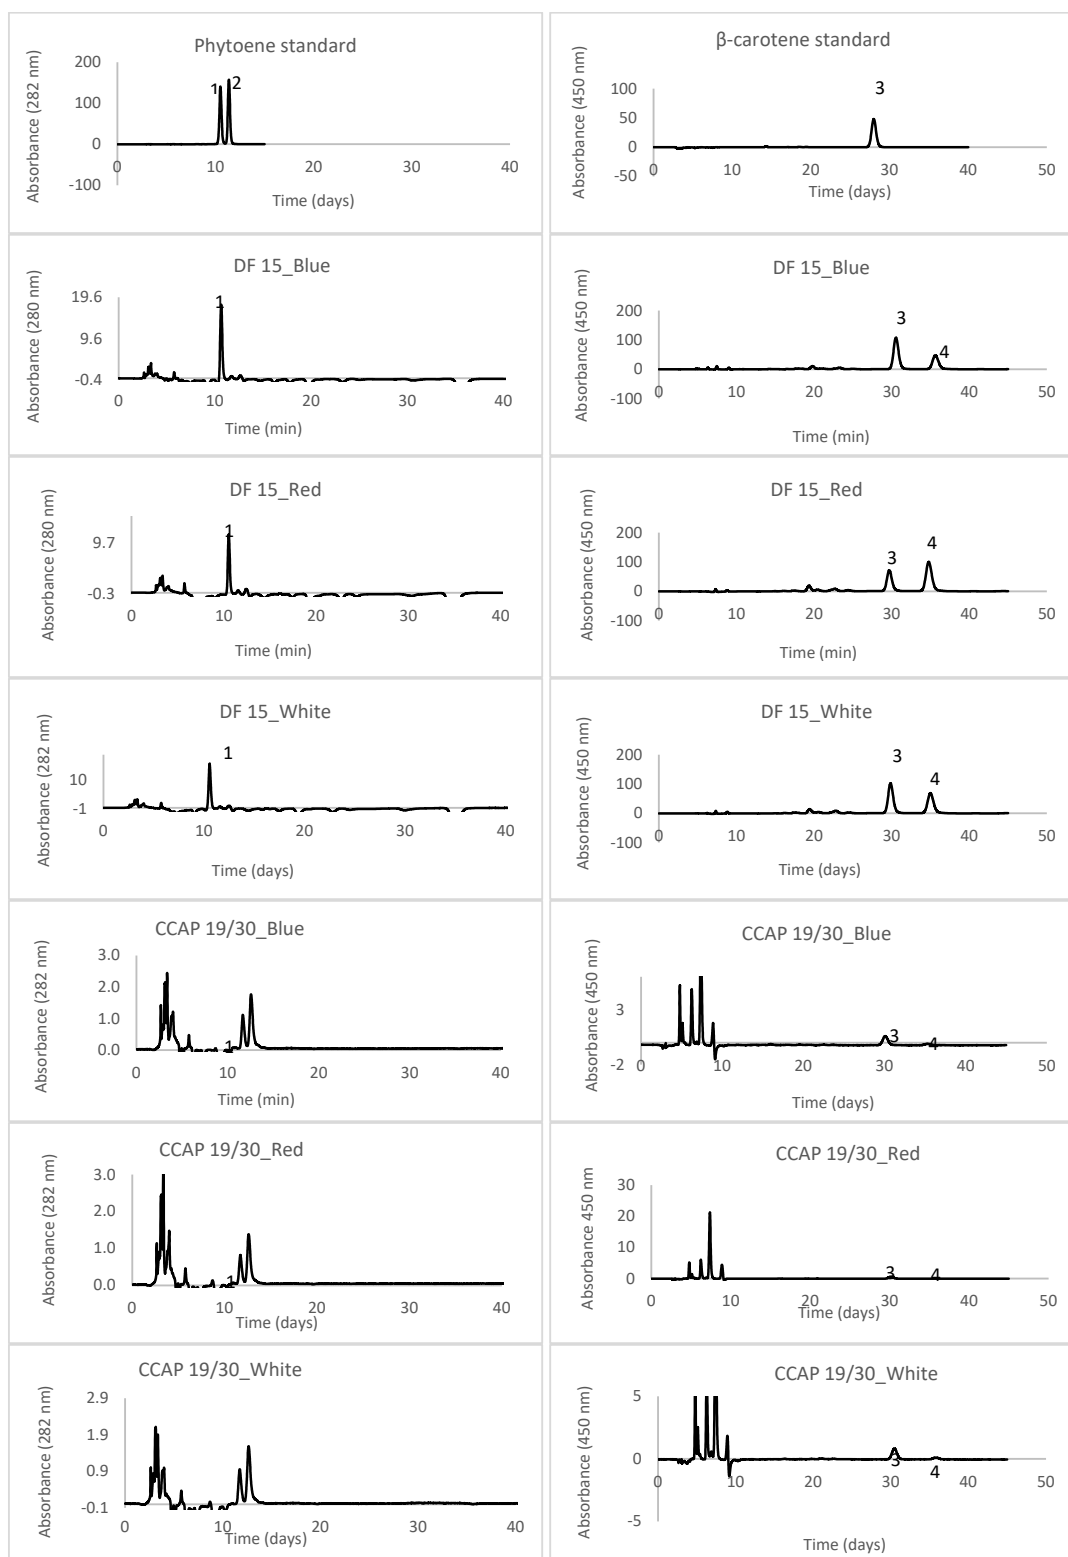

**Figure S3:** HPLC-DAD chromatograms of carotenoids extract from *D. salina* DF15 and *D. salina* CCAP 19/30 under different light wavelengths. The peaks are identified as: phytoene isomer 1 (1), phytoene isomer 2 (2), *all-trans*  $\beta$ -carotene (3) and *9-cis*  $\beta$ -carotene (4).
